# Supplementary material for: A Simulation-Based Approach to Decision Making with Partial Information
Source: Atypon-hosted journal article supplement (doi:10.1287/deca.1120.0252), 2012-10-27
Supplement: deca.1120.0252-sm-online_supplement.xlsx [file deca.1120.0252-sm-online_supplement.xlsx]

## Sheet: Example 1
A Simulation-Based Approach to Decision Making with Partial Information
Luis V. Montiel and J. Eric Bickel
Notation and Rank Correlation Example
Notes
	1. This spreadsheet illustrates our notation and calculates the range of rank correlations along a 1-dimensional truth set (i.e., a line).
	2. Inputs are in bold blue and calculations are in plain black font.
	3. You must specify the two end points of the line and a parameter, lambda, that determines the convex combination.
	4. This spreadsheet is setup so that you can choose either the example in Fig. 1 (page 7) or uniform marginals. Other cases can be investigated by changing the extreme points given below.
	5. The tables illustrate the notation used in the paper.
	6. Rank correlation is calculated using Equation 4. If the you choose the Fig. 1 example then the gamma parameters will match those given in Equation 5.
	7. Choosing the Uniform Marginal examples shows that the rank correlation range is [-0.75,0.75], as proved by Mackenzie (1994).
	8. Choosing the Fig. 1 Example shows that the correlation range is [-.36,0.54]
Calculations
		Example (1=Fig 1., 2 = Uniform Marginals):					1
		Lambda (convex combo of extreme points)					0
									Vertices				Convex Combo			Marginal Distributions
			Fig. 1 Example		Uniform Margins				pdf(E1)	pdf(E2)	cdf(E1)	cdf(E2)	pdf	cdf		Indices		Realizations		Marg pdf		Marg cdf
		P1	0.3	0.6	0.5	0		P1	0.3	0.6	0.3	0.6	0.3	0.3		r1	r2	ωr11	ωr22	q1ω_r1	q2ω_r2	cdf(V1)	cdf(V2)
		P2	0.4	0.1	0	0.5		P2	0.4	0.1	0.7	0.7	0.4	0.7		2	2	2	2	0.7	0.6	1	1
		P3	0.3	0	0	0.5		P3	0.3	0	1	0.7	0.3	1		1	1	1	1	0.3	0.4	0.3	0.4
		P4	0	0.3	0.5	0		P4	0	0.3	1	1	0	1		-	-	-	-	0	0	0	0
		Probability Tree			Indices			Realizations							Marg Probs		Cumulative Probs for Gamma					q+ωk(V1)*	gamma
		V1	V2	(V1,V2)	r1	r2	k	ωr11	ωr22	ωk	ω+k(V1)	ω+k(V2)	ω-k(V1)	ω-k(V2)	q+ωk(V1)	q+ωk(V2)	p1+k	p1-k	p2+k	p2-k	Vωk	q+ωk(V2)	γωk
		0.7	0.428571	0.3	2	2	1	2	2	(2,2)	2	2	1	1	0.7	0.6	1	0.3	1	0.4	0.7644	0.42	1.82
			0.571429	0.4	1	1	2	2	1	(2,1)	2	1	1	-	0.7	0.4	1	0.3	0.4	0	0.1456	0.28	0.52
		0.3	1	0.3	2	2	3	1	2	(1,2)	1	2	-	1	0.3	0.6	0.3	0	1	0.4	0.0756	0.18	0.42
			0	0	1	1	4	1	1	(1,1)	1	1	-	-	0.3	0.4	0.3	0	0.4	0	0.0144	0.12	0.12
		Rank Correlation			-0.36
		Rank Correlation Along Truth Set
		Lambda	-0.36
		0	-0.36
		0.1	-0.27
		0.2	-0.18
		0.3	-0.09
		0.4	0
		0.5	0.09
		0.6	0.18
		0.7	0.27
		0.8	0.36
		0.9	0.45
		1	0.54

## Sheet: Example 2
A Simulation-Based Approach to Decision Making with Partial Information
Luis V. Montiel and J. Eric Bickel
Notation and Rank Correlation Example
Notes
	1. This example corresponds to the example in Appendix A.
	2. You can change the probabilities bold blue.
	3. Make the conditional distributions for V2 differ it you want a case with dependence.
	4. You can see from cell F44 that the correlation is linear in the joint probabilities.
Calculations
												Marginal Distributions
			V1	V2	Joint				pdf	cdf		Indices		Realizations		Marg pdf		Marg cdf
		P1	0.2	0.3	0.06			P1	0.06	0.06		r1	r2	ωr11	ωr22	q1ω_r1	q2ω_r2	cdf(V1)	cdf(V2)
		P2		0.3	0.06			P2	0.06	0.12		0	0	1	1	0.2	0.3	0	0
		P3		0.2	0.04			P3	0.04	0.16		1	1	2	2	0.4	0.3	0.2	0.3
		P4		0.2	0.04			P4	0.04	0.2		2	2	3	3	0.4	0.2	0.6	0.6
		P5	0.4	0.3	0.12			P5	0.12	0.32		3	3	-	4	0	0.2	1	0.8
		P6		0.3	0.12			P6	0.12	0.44		-	4	-	-	0	0	-	1
		P7		0.2	0.08			P7	0.08	0.52
		P8		0.2	0.08			P8	0.08	0.6
		P9	0.4	0.3	0.12			P9	0.12	0.72
		P10		0.3	0.12			P10	0.12	0.84
		P11		0.2	0.08			P11	0.08	0.92
		P12		0.2	0.08			P12	0.08	1
		Probability Tree			Indices			Realizations							Marg Probs		Cumulative Probs for Gamma					q+ωk(V1)*	gamma
		V1	V2	(V1,V2)	r1	r2	k	ωr11	ωr22	ωk	ω+k(V1)	ω+k(V2)	ω-k(V1)	ω-k(V2)	q+ωk(V1)	q+ωk(V2)	p1+k	p1-k	p2+k	p2-k	Vωk	q+ωk(V2)	γωk
		0.2	0.3	0.06	1	1	1	1	1	(1,1)	1	1	0	0	0.2	0.3	0.2	0	0.3	0	0.0036	0.06	0.06
			0.3	0.06	1	2	2	1	2	(1,2)	1	2	0	1	0.2	0.3	0.2	0	0.6	0.3	0.0108	0.06	0.18
			0.2	0.04	1	3	3	1	3	(1,3)	1	3	0	2	0.2	0.2	0.2	0	0.8	0.6	0.0112	0.04	0.28
			0.2	0.04	1	4	4	1	4	(1,4)	1	4	0	3	0.2	0.2	0.2	0	1	0.8	0.0144	0.04	0.36
		0.4	0.3	0.12	2	1	5	2	1	(2,1)	2	1	1	0	0.4	0.3	0.6	0.2	0.3	0	0.0288	0.12	0.24
			0.3	0.12	2	2	6	2	2	(2,2)	2	2	1	1	0.4	0.3	0.6	0.2	0.6	0.3	0.0864	0.12	0.72
			0.2	0.08	2	3	7	2	3	(2,3)	2	3	1	2	0.4	0.2	0.6	0.2	0.8	0.6	0.0896	0.08	1.12
			0.2	0.08	2	4	8	2	4	(2,4)	2	4	1	3	0.4	0.2	0.6	0.2	1	0.8	0.1152	0.08	1.44
		0.4	0.3	0.12	3	1	9	3	1	(3,1)	3	1	2	0	0.4	0.3	1	0.6	0.3	0	0.0576	0.12	0.48
			0.3	0.12	3	2	10	3	2	(3,2)	3	2	2	1	0.4	0.3	1	0.6	0.6	0.3	0.1728	0.12	1.44
			0.2	0.08	3	3	11	3	3	(3,3)	3	3	2	2	0.4	0.2	1	0.6	0.8	0.6	0.1792	0.08	2.24
			0.2	0.08	3	4	12	3	4	(3,4)	3	4	2	3	0.4	0.2	1	0.6	1	0.8	0.2304	0.08	2.88
		Rank Correlation			0
